# Supplementary material for: Efficacy and Safety of Treatment Beyond Progression with anti-PD-(L)1 Therapy in Patients with Advanced Non-Small Cell Lung Cancer: A Meta-analysis
Source: Research Square preprint supplement (doi:10.21203/rs.3.rs-7555351/v1), 2025-12-09
Supplement: Supplementary file 1 [file 85a659c20ed9eba5c257ea1e.xlsx]

## Sheet: Table 2
Newcastle-Ottawa Scale for assessing the quality of studies in meta-analysis
study	Representativeness of exposed cohort	Selection of the non exposed cohort	Ascertainment of exposure	Demonstration that outcome of interest was not present at start of study	Comparability of cohorts on the basis the design or analysis	Assessment of outcome	Was follow-up long enough for outcomes to occur	Adequacy of follow up of cohorts	score
Salous T	1	/	1	/	/	1	1	1	5
Jung HA	1	1	1	1	1	1	1	1	8
Leighl NB	1	1	1	1	1	1	1	1	8
Herzog BH	1	/	1	/	/	1	1	1	5
Lee J	1	/	1	/	/	1	1	1	5
Hellmann MD	1	/	1	/	/	1	1	1	5
J. Neal	/	/	/	/	/	/	/	/	/
Ozguroglu M	/	/	/	/	/	/	/	/	/
Reckamp KL	1	1	1	1	1	1	1	1	8
Gandara DR	1	/	1	1	/	1	1	1	6
Ren S	1	/	1	1	/	1	1	1	5
Zhang Y	1	/	1	1	/	1	1	1	5
Besse B	1	1	1	1	1	1	1	1	7
Baginska J	1	/	1	1	/	1	1	1	5
He K	1	/	1	1	/	1	1	1	5
