# Supplementary material for: Efficacy and Safety of Treatment Beyond Progression with anti-PD-(L)1 Therapy in Patients with Advanced Non-Small Cell Lung Cancer: A Meta-analysis
Source: Research Square preprint supplement (doi:10.21203/rs.3.rs-7555351/v1), 2025-12-09
Supplement: Supplementary file 2 [file cce6d93afc949f0f21a6de67.xlsx]

## Sheet: Table 1
The basic characteristics of studies in meta-analysis
Author	Year	Article Type	Sample	Median age (year)	Gender (Male/Female)	PD-L1 expression level	Outcom	therapy	dose		NOS score
Salous T	2023	Single-Arm Trials	35	63 (44–80)	18 / 17	/	ORR, mOS, mPFS, TRAEs	PD-(L)1+CMT	pembrolizumab 200 mg every 3 weeks	gemcitabine at 1000 mg/m2 on Days 1 and 8 every 3 weeks docetaxel at 60–75 mg/m2 on Day 1 every 3 weeks pemetrexed at 500 mg/m2 on Day 1 every 3 weeks	5
Jung HA	2022	Randomized Controlled Trial	47	63 (36–82)	37 / 10	<1%: 8 1-49%: 15 ≥50%: 24	ORR, mOS, mPFS, TRAEs	PD-(L)1+CMT	pembrolizumab 200 mg every 3 weeks	gemcitabine [1250 mg/m2, day 1 (D1) and day 8 (D8) every 3 weeks] pemetrexed (500 mg/m2, D1 every 3 weeks) docetaxel (60 mg/m2, D1 every 3 weeks) vinorelbine (30 mg/m2, D1, and D8 every 3 weeks)	8
			51	64 (38–79)	43 / 8	<1%: 15 1-49%: 8 ≥50%: 28		CMT	placebo
Leighl NB	2020	Single-Arm Trials	58	68 (49-89)	36 / 22	primary resistance: ＜1%: 10 1-49%: 5 ≥50%: 5 not evaluable: 8 acquired resistance: ＜1%: 3 1-49%: 9 ≥50%: 2 not evaluable: 16	ORR, mOS, mPFS, TRAEs	PD-(L)1+CTLA-4	durvalumab 1500mg + tremelimumab 75mg q4w → durvalumab: q4w		8
Herzog BH	2022	Single-Arm Trials	21	67（42-82）	2023-04-17	＜1%: 4 1-49%: 8 ≥50%: 6 not evaluable: 3	ORR, mOS, mPFS, TRAEs	PD-(L)1+Targeted therapy	atezolizumab:1200mg q3w	ramucirumab 10mg/kg q3w	5
Lee J	2022	Single-Arm Trials	24	63（47-77）	2023-11-13	positive: 6 negative: 18	ORR, mOS, mPFS, TRAEs	PD-(L)1+Targeted therapy	atezolizumab 1200 mg every 3 weeks	bevacizumab 15 mg/kg every 3 weeks	5
Hellmann MD	2021	Single-Arm Trials	76	66（29-85）	40 / 36	positive: 37 negative: 25 not evaluable: 8 not done: 6	ORR, mOS, mPFS, TRAEs	PD-(L)1+Targeted therapy	pembrolizumab 200 mg on cycle day 1 for a maximum of 35 21-day cycles	entinostat 5 mg by mouth on cycle days 1, 8, and 15	5
J. Neal	2023	Randomized Controlled Trial	186	64	/	/	ORR, mOS, mPFS, TRAEs	PD-(L)1+Targeted therapy	atezolizumab 1200 mg IV q3w	cabozantinib 40 mg PO qd	/
			180	66	/	/	ORR, mOS, mPFS, TRAEs	CMT		docetaxel 75 mg/m2 IV q3w
Ozguroglu M	2022	Single-Arm Trials	64	/	/	/	ORR, mOS	PD-(L)1+CMT	cemiplimab 350 mg IV every 3 weeks	/	/
Reckamp KL	2022	Randomized Controlled Trial	69	66.4 (37.6-85.3)	41 / 28	＜1%: 29 1-49%: 21 ≥50%: 12 not evaluable: 7	ORR, mOS, mPFS, TRAEs	PD-(L)1+Targeted therapy			8
			67	65.8 (45.6-84.3)	42 / 25	＜1%: 26 1-49%: 22 ≥50%: 16 not evaluable: 3	ORR, mOS, mPFS, TRAEs	CMT	pembrolizumab+ramucirmab	ramucirumab docetaxel gemcitabine pemetrexed
Gandara DR	2018	Randomized Controlled Trial	168	63 (33-82)	99 / 69	TC3: 31 TC2/3: 50 TC1/2/3: 100 TC0: 67	ORR, mOS, mPFS	PD-(L)1	Atezolizumab		6
			87	/	/	/	mOS	non-immunotherapy
Ren S	2024	Single-Arm Trials	40	63 (41-73)	36/4	< 1% 27 (67.5) ≥ 1% 11 (27.5) 1–49% 6 (15.0) ≥ 50% 5 (12.5)	ORR, mOS, mPFS, TRAEs	PD-(L)1+Targeted therapy	camrelizumab 200 mg(Q3W)	famitinib 20 mg(QD)	5
Zhang Y	2024	Single-Arm Trials	30	59 (27-74)	31/3	/	ORR, mPFS	PD-(L)1+Targeted therapy	envafolimab 400 mg every 4 weeks	chidamide 20 mg p.o. twice a week	5
Besse B	2024	Randomized Controlled Trial	79	63 (42-80)	52/25	< 1% 21 (26.6%) ≥ 1% 42 (53.2%) 1–49% 25 (31.6%) ≥ 50% 5 (12.5)	ORR, mOS, mPFS, TRAEs	PD-(L)1+Targeted therapy	durvalumab	ceralasertib	7
			189	64 (35-85)	103/86	< 1% 30 (15.9%) ≥ 1% 85 (45.0%) 1–49% 39 (20.6%) ≥ 50% 5 (12.5)		PD-(L)1+Targeted therapy	durvalumab	Olaparib/Danvatirsen/Oleclumab
Borghaei H	2024	Randomized Controlled Trial	284	65 (35-85)	170/114	High 48 (16.9%) Low 169 (59.5%) Missing 67 (23.6%)	ORR, mOS, TRAEs	PD-(L)1+Targeted therapy	nivo (240 mg every 2 weeks or 480 mg every 4 weeks intravenous)	sitra (100 mg once daily orally)	7
			293	65 (23-86)	168/125	High 47 (16.0%) Low 175 (59.7%) Missing 71 (24.2)		CMT	docetaxel (75 mg/m2 every 3 weeks intravenous)
He K	2023	Single-Arm Trials	124	66 (37-87)	58/66	/	ORR, mOS, mPFS, TRAEs	PD-(L)1+Targeted therapy	Nivolumab 240 mg every 2 weeks or 480 mg every 4 weeks	Sitravatinib capsules (120 mg)	5
